# Supplementary material for: Dendritic Cell Vaccination in Conjunction with a TLR Agonist Polarizes Interferon Immune Responses in Malignant Glioma Patients
Source: Research Square preprint supplement (doi:10.21203/rs.3.rs-3287211/v1), 2023-09-12
Supplement: Supplementary file 2 [file 78750b520ad33283de97abba.pdf]

Reporting Summary

Nature Portfolio wishes to improve the reproducibility of the work that we publish. This form provides structure for consistency and transparency in reporting. For further information on Nature Portfolio policies, see our [Editorial Policies](#) and the [Editorial Policy Checklist](#).

Statistics

For all statistical analyses, confirm that the following items are present in the figure legend, table legend, main text, or Methods section.

|                                     |                                                                                                                                                                                                                                                                                                |
|-------------------------------------|------------------------------------------------------------------------------------------------------------------------------------------------------------------------------------------------------------------------------------------------------------------------------------------------|
| n/a                                 | Confirmed                                                                                                                                                                                                                                                                                      |
| <input type="checkbox"/>            | <input checked="" type="checkbox"/> The exact sample size ( <i>n</i> ) for each experimental group/condition, given as a discrete number and unit of measurement                                                                                                                               |
| <input type="checkbox"/>            | <input checked="" type="checkbox"/> A statement on whether measurements were taken from distinct samples or whether the same sample was measured repeatedly                                                                                                                                    |
| <input type="checkbox"/>            | <input checked="" type="checkbox"/> The statistical test(s) used AND whether they are one- or two-sided<br><i>Only common tests should be described solely by name; describe more complex techniques in the Methods section.</i>                                                               |
| <input type="checkbox"/>            | <input checked="" type="checkbox"/> A description of all covariates tested                                                                                                                                                                                                                     |
| <input type="checkbox"/>            | <input checked="" type="checkbox"/> A description of any assumptions or corrections, such as tests of normality and adjustment for multiple comparisons                                                                                                                                        |
| <input type="checkbox"/>            | <input checked="" type="checkbox"/> A full description of the statistical parameters including central tendency (e.g. means) or other basic estimates (e.g. regression coefficient) AND variation (e.g. standard deviation) or associated estimates of uncertainty (e.g. confidence intervals) |
| <input type="checkbox"/>            | <input checked="" type="checkbox"/> For null hypothesis testing, the test statistic (e.g. <i>F</i> , <i>t</i> , <i>r</i> ) with confidence intervals, effect sizes, degrees of freedom and <i>P</i> value noted<br><i>Give P values as exact values whenever suitable.</i>                     |
| <input checked="" type="checkbox"/> | <input type="checkbox"/> For Bayesian analysis, information on the choice of priors and Markov chain Monte Carlo settings                                                                                                                                                                      |
| <input checked="" type="checkbox"/> | <input type="checkbox"/> For hierarchical and complex designs, identification of the appropriate level for tests and full reporting of outcomes                                                                                                                                                |
| <input checked="" type="checkbox"/> | <input type="checkbox"/> Estimates of effect sizes (e.g. Cohen's <i>d</i> , Pearson's <i>r</i> ), indicating how they were calculated                                                                                                                                                          |

Our web collection on [statistics for biologists](#) contains articles on many of the points above.

Software and code

Policy information about [availability of computer code](#)

|                 |                                                                                                                                                                                                        |
|-----------------|--------------------------------------------------------------------------------------------------------------------------------------------------------------------------------------------------------|
| Data collection | Sample processing and data generation are described in the method section. RNA-seq data was generated at UCLA TCGB sequencing core. Mass cytometry data was generated at UCLA JCCC Flow Cytometry core |
| Data analysis   | The analysis is included in the method section. The source code of the analysis is available upon reasonable request                                                                                   |

For manuscripts utilizing custom algorithms or software that are central to the research but not yet described in published literature, software must be made available to editors and reviewers. We strongly encourage code deposition in a community repository (e.g. GitHub). See the Nature Portfolio [guidelines for submitting code & software](#) for further information.

Data

Policy information about [availability of data](#)

All manuscripts must include a [data availability statement](#). This statement should provide the following information, where applicable:

- Accession codes, unique identifiers, or web links for publicly available datasets
- A description of any restrictions on data availability
- For clinical datasets or third party data, please ensure that the statement adheres to our [policy](#)

RNAseq data was uploaded to GEO under accession GSE237581 and CyTOF data was uploaded to FlowRepository under accession FR-FCM-Z6LY

## Research involving human participants, their data, or biological material

Policy information about studies with [human participants or human data](#). See also policy information about [sex, gender \(identity/presentation\), and sexual orientation](#) and [race, ethnicity and racism](#).

|                                                                    |                                                                                                                                                      |
|--------------------------------------------------------------------|------------------------------------------------------------------------------------------------------------------------------------------------------|
| Reporting on sex and gender                                        | Information about patient biological sex and gender is included in Supp Table 1                                                                      |
| Reporting on race, ethnicity, or other socially relevant groupings | Not applicable here.                                                                                                                                 |
| Population characteristics                                         | Disease relevant clinical characteristics of the patient population are included in Supp Table 1                                                     |
| Recruitment                                                        | Participants were recruited by co-investigators at UCLA Medical Center based on protocol eligibility criteria and verified by the study coordinator. |
| Ethics oversight                                                   | Patients signed an Informed Consent. This trial was approved by the UCLA Institutional Review Board                                                  |

Note that full information on the approval of the study protocol must also be provided in the manuscript.

## Field-specific reporting

Please select the one below that is the best fit for your research. If you are not sure, read the appropriate sections before making your selection.

☒ Life sciences ☐ Behavioural & social sciences ☐ Ecological, evolutionary & environmental sciences

For a reference copy of the document with all sections, see [nature.com/documents/nr-reporting-summary-flat.pdf](https://www.nature.com/documents/nr-reporting-summary-flat.pdf)

## Life sciences study design

All studies must disclose on these points even when the disclosure is negative.

|                 |                                                                                                                                                                                                                 |
|-----------------|-----------------------------------------------------------------------------------------------------------------------------------------------------------------------------------------------------------------|
| Sample size     | The size of treatment groups are included in the main text and Supp. Table 1. Group sizes were purely based on samples that we have collected from patients.                                                    |
| Data exclusions | CyTOF and RNA-seq samples passing QC are listed in Supp. Table 1                                                                                                                                                |
| Replication     | Data collected on individual patient samples could not be replicated due to the limited quantity of available specimens.                                                                                        |
| Randomization   | Subjects were randomized at enrollment into 3 groups (placebo, Resiquimod, and Poly ICLC).                                                                                                                      |
| Blinding        | Neither investigators nor patients were blinded to allocated treatment arm in this single site randomized study. Clinical equipoise was presumed maintained as both treatment arms received ATL-DC vaccination. |

## Reporting for specific materials, systems and methods

We require information from authors about some types of materials, experimental systems and methods used in many studies. Here, indicate whether each material, system or method listed is relevant to your study. If you are not sure if a list item applies to your research, read the appropriate section before selecting a response.

### Materials & experimental systems

| n/a                                 | Involved in the study                                  |
|-------------------------------------|--------------------------------------------------------|
| <input type="checkbox"/>            | <input checked="" type="checkbox"/> Antibodies         |
| <input checked="" type="checkbox"/> | <input type="checkbox"/> Eukaryotic cell lines         |
| <input checked="" type="checkbox"/> | <input type="checkbox"/> Palaeontology and archaeology |
| <input checked="" type="checkbox"/> | <input type="checkbox"/> Animals and other organisms   |
| <input type="checkbox"/>            | <input checked="" type="checkbox"/> Clinical data      |
| <input checked="" type="checkbox"/> | <input type="checkbox"/> Dual use research of concern  |
| <input checked="" type="checkbox"/> | <input type="checkbox"/> Plants                        |

### Methods

| n/a                                 | Involved in the study                                      |
|-------------------------------------|------------------------------------------------------------|
| <input checked="" type="checkbox"/> | <input type="checkbox"/> ChIP-seq                          |
| <input checked="" type="checkbox"/> | <input type="checkbox"/> Flow cytometry                    |
| <input type="checkbox"/>            | <input checked="" type="checkbox"/> MRI-based neuroimaging |

## Antibodies

|                 |                                                               |
|-----------------|---------------------------------------------------------------|
| Antibodies used | The list of antibodies for CyTOF is listed in Suppl. Table 3A |
|-----------------|---------------------------------------------------------------|

## Validation

For metal conjugated antibodies used for CyTOF, validation was performed as described by the manufacturer (Fluidigm) or by the UCLA Jonsson Comprehensive Cancer Center (JCCC) Flow Cytometry Core Facility using the appropriate positive and negative cell staining and/or activation controls.

## Clinical data

Policy information about [clinical studies](#)

All manuscripts should comply with the ICMJE [guidelines for publication of clinical research](#) and a completed [CONSORT checklist](#) must be included with all submissions.

## Clinical trial registration

NCT01204684

## Study protocol

The clinical protocol is attached as a supplement with the manuscript submission.

## Data collection

Patients were recruited and completed treatment between 2010 and 2014. Survival follow-up continued until the present date.

## Outcomes

The primary endpoint was the most effective combination of DC vaccine components. This was assessed by the immune monitoring described in the manuscript. The secondary outcomes were time to tumor progression and overall survival. These were assessed by Cox Regression and graphed by Kaplan-Meier plots.

## Magnetic resonance imaging

### Experimental design

## Design type

N/A - The current study did not involve "functional" MRI, only anatomic MRI for visualizing and quantifying treatment response.

## Design specifications

N/A - The current study involved acquisition of structural (anatomic) MRI at screening, prior to surgery, after surgery, and every treatment cycle until tumor progression, plus subsequent "off treatment" MRI scans until patient death.

## Behavioral performance measures

N/A

### Acquisition

## Imaging type(s)

Structural/Anatomic

## Field strength

3.0 T

## Sequence &amp; imaging parameters

Anatomic MR images were acquired prior to DC + adjuvant treatment and at 2-month intervals for all patients using the standardized brain tumor imaging protocol (BTIP), including three dimensional pre- and post-contrast T1-weighted images at 1-1.5mm isotropic resolution, two-dimensional T2-weighted and T2-weighted fluid attenuated inversion recovery (FLAIR) images with 3-4mm slice thickness and no interslice gap, and diffusion-weighted images with b=0, 500, and 1000 s/mm<sup>2</sup>, 3-4mm slice thickness and no interslice gap.

## Area of acquisition

Whole brain

## Diffusion MRI

☐ Used

☒ Not used

### Preprocessing

## Preprocessing software

Linear registration was performed between all images (T2, FLAIR, pre-contrast T1, post-contrast T1) to post-contrast T1-weighted images at screening using a 12-degree-of-freedom linear transformation and a correlation coefficient cost function in FSL (FLIRT; FMRIB Software Library, Oxford, England; <http://www.fmrib.ox.ac.uk/fsl/>).

Estimates of tumor volume were performed using contrast-enhanced T1-weighted digital subtraction maps to exclude areas of post-surgical blood products or other sources of T1 shortening. T1 subtraction maps were created by first performing linear registration as described above. Next, Gaussian normalization of image intensity was performed for both nonenhanced and contrast enhanced T1-weighted images using custom c-code courtesy of the National Institutes of Health Magnetoencephalography Core Facility (3dNormalize; NIMH MEG Core, Bethesda, MD; [kurage.nimh.nih.gov/meglab/Med/3dNormalize](http://kurage.nimh.nih.gov/meglab/Med/3dNormalize)), which normalizes image intensity by dividing each voxel by the standard deviation of the image intensity from the whole brain [ $S_{Nor}(x,y,z) = S(x,y,z)/stdWB$ ], where S is raw image signal intensity, Nor is normalized, x,y,z are voxel coordinates, and stdWB is whole brain standard deviation. Next, voxel-by-voxel subtraction between normalized nonenhanced and contrast-enhanced T1-weighted images was performed using the Analysis of Functional NeuroImages software package (AFNI; 3dcalc; <https://afni.nimh.nih.gov/>). Image voxels with a positive (greater than zero) before-to-after change in normalized contrast enhancement signal intensity (ie, voxels increasing in MR signal after contrast agent administration) within T2-weighted FLAIR hyperintense regions were isolated to create the final T1 subtraction maps in order to exclude large vessels and other hyperintense regions outside the primary tumor area. Estimates of tumor volume included areas of contrast enhancement on T1 subtraction maps. Initial segmentation was performed automatically and final segmented volumes were edited by an experienced independent observer with more than 10 years of experience to exclude large vessels and any obvious non-tumor regions.

|                            |                                                                                                                                                                                                                                                                                                                                                                                                                                                                                                                                                                                                              |
|----------------------------|--------------------------------------------------------------------------------------------------------------------------------------------------------------------------------------------------------------------------------------------------------------------------------------------------------------------------------------------------------------------------------------------------------------------------------------------------------------------------------------------------------------------------------------------------------------------------------------------------------------|
| Normalization              | Intensity normalization was performed using custom c-code courtesy of the National Institutes of Health Magnetoencephalography Core Facility (3dNormalize; NIMH MEG Core, Bethesda, MD; <a href="https://kurage.nimh.nih.gov/meglab/Med/3dNormalize">kurage.nimh.nih.gov/meglab/Med/3dNormalize</a> ), which normalizes image intensity by dividing each voxel by the standard deviation of the image intensity from the whole brain [ $SNor(x,y,z) = S(x,y,z)/stdWB$ ], where S is raw image signal intensity, Nor is normalized, x,y,z are voxel coordinates, and stdWB is whole brain standard deviation. |
| Normalization template     | Images were not normalized/registered to a standard template space. All images were registered to the patient-specific screening MRI exam as mentioned above.                                                                                                                                                                                                                                                                                                                                                                                                                                                |
| Noise and artifact removal | No noise or artifact removal was performed.                                                                                                                                                                                                                                                                                                                                                                                                                                                                                                                                                                  |
| Volume censoring           | N/A                                                                                                                                                                                                                                                                                                                                                                                                                                                                                                                                                                                                          |

## Statistical modeling & inference

|                                           |                                                                                                                                                                                                                         |
|-------------------------------------------|-------------------------------------------------------------------------------------------------------------------------------------------------------------------------------------------------------------------------|
| Model type and settings                   | <i>Specify type (mass univariate, multivariate, RSA, predictive, etc.) and describe essential details of the model at the first and second levels (e.g. fixed, random or mixed effects; drift or auto-correlation).</i> |
| Effect(s) tested                          | <i>Define precise effect in terms of the task or stimulus conditions instead of psychological concepts and indicate whether ANOVA or factorial designs were used.</i>                                                   |
| Specify type of analysis:                 | <input type="checkbox"/> Whole brain <input type="checkbox"/> ROI-based <input type="checkbox"/> Both                                                                                                                   |
| Statistic type for inference              | <i>Specify voxel-wise or cluster-wise and report all relevant parameters for cluster-wise methods.</i>                                                                                                                  |
| (See <a href="#">Eklund et al. 2016</a> ) |                                                                                                                                                                                                                         |
| Correction                                | <i>Describe the type of correction and how it is obtained for multiple comparisons (e.g. FWE, FDR, permutation or Monte Carlo).</i>                                                                                     |

## Models & analysis

|                                               |                                                                                                                                                                                                                                  |
|-----------------------------------------------|----------------------------------------------------------------------------------------------------------------------------------------------------------------------------------------------------------------------------------|
| n/a                                           | Involvement in the study                                                                                                                                                                                                         |
| <input type="checkbox"/>                      | <input type="checkbox"/> Functional and/or effective connectivity                                                                                                                                                                |
| <input type="checkbox"/>                      | <input type="checkbox"/> Graph analysis                                                                                                                                                                                          |
| <input type="checkbox"/>                      | <input type="checkbox"/> Multivariate modeling or predictive analysis                                                                                                                                                            |
| Functional and/or effective connectivity      | <i>Report the measures of dependence used and the model details (e.g. Pearson correlation, partial correlation, mutual information).</i>                                                                                         |
| Graph analysis                                | <i>Report the dependent variable and connectivity measure, specifying weighted graph or binarized graph, subject- or group-level, and the global and/or node summaries used (e.g. clustering coefficient, efficiency, etc.).</i> |
| Multivariate modeling and predictive analysis | <i>Specify independent variables, features extraction and dimension reduction, model, training and evaluation metrics.</i>                                                                                                       |
